# Supplementary material
Source: ML conference proceedings conference paper supplement (https://proceedings.neurips.cc/paper_files/paper/2019/hash/80a8155eb153025ea1d513d0b2c4b675-Abstract.html)
Supplement: Supplementary file [file 80a8155eb153025ea1d513d0b2c4b675-Supplemental.zip]

## A Riesz-Thorin Interpolation Theorem

**Lemma A.1** (Riesz-Thorin interpolation theorem, see Lemma 8.5 in [?]). *Let  $(X_i, \mathfrak{M}_i, \mu_i)$ ,  $i = 0, 1, 2, \dots, n$  be measure spaces. Let  $V_i$  represent the complex vector space of simple functions on  $X_i$ . Suppose that*

$$\Lambda : V_1 \times V_2 \times \dots \times V_n \rightarrow V_0.$$

*is a multi-linear operator of types  $p_0$  and  $p_1$  where  $p_0, p_1 \in [1, \infty]$ , with constants  $M_0$  and  $M_1$ , respectively. i.e.,*

$$\|\Lambda(f_1, f_2, \dots, f_n)\|_{p_i} \leq M_{p_i} \|f_1\|_{p_i} \|f_2\|_{p_i} \dots \|f_n\|_{p_i}.$$

*for  $i = 0, 1$ . Let  $\theta \in [0, 1]$  and define*

$$\frac{1}{p_\theta} := \frac{1-\theta}{p_0} + \frac{\theta}{p_1}.$$

*Then,  $\Lambda$  is of type  $p_\theta$  with constant  $M_{p_\theta} := M_{p_0}^{1-\theta} M_{p_1}^\theta$ , that is,*

$$\|\Lambda(f_1, f_2, \dots, f_n)\|_{p_\theta} \leq M_{p_\theta} \|f_1\|_{p_\theta} \|f_2\|_{p_\theta} \dots \|f_n\|_{p_\theta}.$$

Lemma ?? is a direct corollary of this theorem.

## B Lower Bounds

In this section, we will prove Theorem ?. The proof is constructive: we prove the theorem by showing for all  $\varepsilon > 0$ , we can construct a matrix  $A(\varepsilon)$ , such that selecting every  $k$  columns of  $A(\varepsilon)$  leads to an approximation ratio at least  $\frac{(k+1)^{1-\frac{1}{p}}}{(1+k\varepsilon^q)^{1/q}}$ . Then, the theorem follows by letting  $\varepsilon \rightarrow 0^+$ . Our choice of  $A(\varepsilon)$  is a perturbation of Hadamard matrices, defined below.

Throughout the proof of Theorem ?, we assume that  $k = 2^r - 1$ , for some  $r \in \mathbb{Z}^+$ , and  $\varepsilon > 0$  is an arbitrarily small constant.

*Proof.* of Theorem ?: We consider the well known Hadamard matrix of order  $(k+1) = 2^r$ , defined below:

$$H^{(1)} = 1, \\ H^{(2^l)} = \begin{pmatrix} H^{(2^{l-1})} & H^{(2^{l-1})} \\ H^{(2^{l-1})} & -H^{(2^{l-1})} \end{pmatrix}, l \geq 1.$$

The Hadamard matrix has the following properties: (we will use  $H$  to represent  $H^{(2^r)}$  when it's clear from context)

- $H_{di} = 1$  or  $H_{di} = -1$ .
- All entries on the first row are ones, i.e.  $H_{1j} = 1$ .
- The columns of  $H$  are pairwise orthogonal, i.e.

$$\sum_{d=1}^{k+1} H_{di} H_{dj} = 0$$

holds when  $i \neq j$ .

Now we can define  $A(\varepsilon)$ : it is a perturbation of  $H$  by replacing all the entries on the first row by  $\varepsilon$ , i.e.,

$$A(\varepsilon)_{ij} = \begin{cases} \varepsilon & \text{when } i = 1, \\ H_{ij} & \text{when } i \neq 1. \end{cases} \quad (1)$$

We can see that  $A(\varepsilon)$  is close to a rank- $k$  matrix. In fact,  $A(0)$  has rank at most  $k$ . Also,  $A(0)$  is an  $2^r \times 2^r$ , or equivalently,  $(k+1) \times (k+1)$  matrix, and it has all zeros on the first row. Therefore, we can upper bound OPT by

$$\text{OPT} \leq \|A(\varepsilon) - A(0)\|_p = ((k+1)\varepsilon^p)^{1/p} = (k+1)^{1/p} \varepsilon.$$

The remaining work is to give a lower bound on the approximation error using any  $k$  columns. For simplicity of notations, we use  $A$  as shorthand for  $A(\varepsilon)$  when it's clear from context. Say we are using all  $(k+1)$  columns except the  $j$ -th, i.e. the column subset is  $A_{[k+1]-\{j\}}$ . Obviously, we achieve zero error on all the columns other than the  $j$ -th. Therefore, the approximation error is essentially the  $\ell_p$  distance from  $A_j$  to  $\text{span}\{A_{[k+1]-\{j\}}\}$ . Thus,

$$\begin{aligned} \text{Err}(A_{[k+1]-\{j\}}) &= \inf_{x_i \in \mathbb{R}} \|A_j - \sum_{i \neq j} x_i A_i\|_p \\ &= \inf_{x_i \in \mathbb{R}} \left( \sum_{d=1}^{k+1} \left| A_{dj} - \sum_{i \neq j} x_i A_{di} \right|^p \right)^{1/p} \\ &= \inf_{x_i \in \mathbb{R}} \left( \varepsilon^p \left| 1 - \sum_{i \neq j} x_i \right|^p + \sum_{d=2}^{k+1} \left| H_{dj} - \sum_{i \neq j} x_i H_{di} \right|^p \right)^{1/p}. \end{aligned}$$

By Hölder's inequality,

$$\begin{aligned} &\left( \varepsilon^p \left| 1 - \sum_{i \neq j} x_i \right|^p + \sum_{d=2}^{k+1} \left| H_{dj} - \sum_{i \neq j} x_i H_{di} \right|^p \right)^{1/p} \left( \left( \frac{1}{\varepsilon} \right)^q + \sum_{d=2}^{k+1} |H_{dj}|^q \right)^{1/q} \\ &\geq \left( 1 - \sum_{i \neq j} x_i \right) + \sum_{d=2}^{k+1} H_{dj} \left( H_{dj} - \sum_{i \neq j} x_i H_{di} \right) \end{aligned}$$

where  $\frac{1}{p} + \frac{1}{q} = 1$ .

We can actually show that  $RHS = k+1$ .

Using the fact that  $H_{1i} = H_{1j} = 1$  and  $\sum_{d=1}^{k+1} H_{di} H_{dj} = 0$ ,

$$\begin{aligned} RHS &= \left( 1 - \sum_{i \neq j} x_i \right) + \sum_{d=2}^{k+1} H_{dj} \left( H_{dj} - \sum_{i \neq j} x_i H_{di} \right) \\ &= \left( 1 - \sum_{i \neq j} H_{1i} H_{1j} x_i \right) + \sum_{d=2}^{k+1} \left( 1 - \sum_{i \neq j} x_i H_{di} H_{dj} \right) \\ &= \sum_{d=1}^{k+1} \left( 1 - \sum_{i \neq j} x_i H_{di} H_{dj} \right) \\ &= (k+1) - \sum_{i \neq j} x_i \left( \sum_{d=1}^{k+1} H_{di} H_{dj} \right) \\ &= k+1. \end{aligned}$$

Now we can finally bound the approximation error

$$\begin{aligned}
\text{Err}(A_{[k+1]-\{j\}}) &= \inf_{x_i \in \mathbb{R}} \left( \varepsilon^p \left| 1 - \sum_{i \neq j} x_i \right|^p + \sum_{d=2}^{k+1} \left| H_{dj} - \sum_{i \neq j} x_i H_{di} \right|^p \right)^{1/p} \\
&\geq \frac{k+1}{\left( \left( \frac{1}{\varepsilon} \right)^q + \sum_{d=2}^{k+1} |H_{dj}|^q \right)^{1/q}} \\
&= \frac{k+1}{(\varepsilon^{-q} + k)^{1/q}} \\
&= \frac{(k+1)\varepsilon}{(1 + k\varepsilon^q)^{1/q}}.
\end{aligned}$$

Thus,

$$\frac{\text{Err}(A_{[k+1]-\{j\}})}{\text{OPT}} \geq \frac{(k+1)^{1-\frac{1}{p}}}{(1 + k\varepsilon^q)^{1/q}}.$$

Note that this bound can be arbitrarily close to  $(k+1)^{1-\frac{1}{p}}$  when  $\varepsilon$  is small enough, thus we complete the proof.  $\square$

## C Proof of Equation (??)

Now we are going to prove (??). First, we need to extend the definition of  $b_J$  for all  $J = (j_1, \dots, j_k) \in [m]^k$ . This definition is similar to the property of determinants.

- When  $1 \leq j_1 < j_2 < \dots < j_k \leq m$ , i.e.  $J \in \binom{[m]}{k}$ ,  $b_J$  is already defined.
- When there exists  $s \neq t, j_s = j_t$ , define  $b_J = 0$ .
- Otherwise, there exists  $1 \leq j'_1 < j'_2 < \dots < j'_k \leq m$  and a permutation  $\pi$ , such that

$$(j_1, \dots, j_k) = \pi(j'_1, j'_2, \dots, j'_k).$$

Let  $J' = (j'_1, j'_2, \dots, j'_k)$ . In such case, we define

$$b_J = \text{sign}(\pi) b_{J'},$$

where  $\text{sign}(\pi)$  is the parity of  $\pi$ , i.e.  $\text{sign}(\pi) = 1$  if  $\pi$  is an even permutation, and  $\text{sign}(\pi) = -1$  otherwise.

Note that if  $J$  is a transposition (2-element exchanges) of  $\tilde{J}$ , then  $b_J = -b_{\tilde{J}}$ .

We can also define  $[\Lambda(a, b)]_I$  for all  $I \in [m]^{k+1}$ , by

$$[\Lambda(a, b)]_I = \sum_{t=1}^{k+1} (-1)^{t+1} a_{i_t} b_{I_{-t}}.$$

Here,  $I_{-t} = (i_1, \dots, i_{t-1}, i_{t+1}, \dots, i_{k+1}) \in [m]^k$ . Similarly, if  $I$  is a transposition (2-element exchanges) of  $\tilde{I}$ , then  $[\Lambda(a, b)]_I = -[\Lambda(a, b)]_{\tilde{I}}$ .

As mentioned before, we only need to verify (??) for the special cases  $p = 1, 2, \infty$ . In the proof below, we will use either ordered subsets (e.g.  $I \in [m]^k$ ) or unordered subsets (e.g.  $I \in \binom{[m]}{k}$ ), whichever is more convenient.

**Case 1:**  $p = 1$ . The inequality is equivalent to

$$\|\Lambda(a, b)\|_1 \leq \|a\|_1 \|b\|_1.$$

In fact, by the definition, we always have

$$\|\Lambda(a, b)\|_1 = \sum_{I \in \binom{[m]}{k+1}} |[\Lambda(a, b)]_I| = \frac{1}{(k+1)!} \sum_{I \in [m]^{k+1}} |[\Lambda(a, b)]_I|.$$

Therefore,

$$\begin{aligned}
\|\Lambda(a, b)\|_1 &= \frac{1}{(k+1)!} \sum_{I \in [m]^{k+1}} \left| \sum_{t=1}^{k+1} (-1)^{t+1} a_{i_t} b_{I-t} \right| \\
&\leq \frac{1}{(k+1)!} \sum_{I \in [m]^{k+1}} \sum_{t=1}^{k+1} |a_{i_t}| |b_{I-t}| \\
&= \frac{1}{(k+1)!} (k+1) \sum_{I \in [m]^{k+1}} |a_{i_1}| |b_{I-1}| \\
&= \frac{1}{k!} \sum_{i_1 \in [m]} |a_{i_1}| \sum_{J \in [m]^k} |b_J| \\
&= \sum_{i_1 \in [m]} |a_{i_1}| \sum_{J \in \binom{[m]}{k}} |b_J| \\
&= \|a\|_1 \|b\|_1.
\end{aligned}$$

**Case 2:**  $p = \infty$ . The inequality is equivalent to

$$\|\Lambda(a, b)\|_\infty \leq (k+1) \|a\|_\infty \|b\|_\infty$$

$$\begin{aligned}
\|\Lambda(a, b)\|_\infty &= \max_{I \in \binom{[m]}{k+1}} |[\Lambda(a, b)]_I| \\
&= \max_{I \in \binom{[m]}{k+1}} \left| \sum_{t=1}^{k+1} (-1)^{t+1} a_{i_t} b_{I-t} \right| \\
&\leq \max_{I \in \binom{[m]}{k+1}} \sum_{t=1}^{k+1} |a_{i_t}| |b_{I-t}| \\
&\leq \sum_{t=1}^{k+1} \max_{i_t \in [m]} |a_{i_t}| \max_{J \in \binom{[m]}{k}} |b_J| \\
&= (k+1) \max_{i_1 \in [m]} |a_{i_1}| \max_{J \in \binom{[m]}{k}} |b_J| \\
&= (k+1) \|a\|_\infty \|b\|_\infty.
\end{aligned}$$

**Case 3:**  $p = 2$ . The inequality is equivalent to

$$\|\Lambda(a, b)\|_2 \leq \|a\|_2 \|b\|_2.$$

$$\begin{aligned}
\|\Lambda(a, b)\|_2^2 &= \sum_{I \in \binom{[m]}{k+1}} |[\Lambda(a, b)]_I|^2 \\
&= \frac{1}{(k+1)!} \sum_{I \in [m]^{k+1}} |[\Lambda(a, b)]_I|^2 \\
&= \frac{1}{(k+1)!} \sum_{I \in [m]^{k+1}} \left| \sum_{t=1}^{k+1} (-1)^{t+1} a_{i_t} b_{I-t} \right|^2.
\end{aligned}$$

Note that

$$\begin{aligned} \left| \sum_{t=1}^{k+1} (-1)^{t+1} a_{i_t} b_{I_{-t}} \right|^2 &= \left( \sum_{t=1}^{k+1} (-1)^{t+1} a_{i_t} b_{I_{-t}} \right) \left( \sum_{s=1}^{k+1} (-1)^{s+1} \bar{a}_{i_s} \bar{b}_{I_{-s}} \right) \\ &= \sum_{t=1}^{k+1} |a_{i_t}|^2 |b_{I_{-t}}|^2 + \sum_{1 \leq t \neq s \leq k+1} (-1)^{t+s} a_{i_t} b_{I_{-t}} \bar{a}_{i_s} \bar{b}_{I_{-s}}. \end{aligned}$$

Therefore,

$$(k+1)! \|\Lambda(a, b)\|_2^2 = \sum_{I \in [m]^{k+1}} \sum_{t=1}^{k+1} |a_{i_t}|^2 |b_{I_{-t}}|^2 + \sum_{I \in [m]^{k+1}} \sum_{1 \leq t \neq s \leq k+1} (-1)^{t+s} a_{i_t} b_{I_{-t}} \bar{a}_{i_s} \bar{b}_{I_{-s}}.$$

The first term can be simplified as

$$\begin{aligned} &\sum_{I \in [m]^{k+1}} \sum_{t=1}^{k+1} |a_{i_t}|^2 |b_{I_{-t}}|^2 \\ &= (k+1) \sum_{i_1 \in [m]} |a_{i_1}|^2 \sum_{J \in [m]^k} |b_J|^2 \\ &= (k+1)! \|a\|_2^2 \|b\|_2^2. \end{aligned}$$

Therefore, we only need to prove that the second term is non-positive.

When  $t < s$ ,

$$\begin{aligned} b_{I_{-s}} &= b_{(i_1, \dots, i_{s-1}, i_{s+1}, \dots, i_{k+1})} \\ &= (-1)^{t-1} b_{(i_t, i_1, \dots, i_{t-1}, i_{t+1}, \dots, i_{s-1}, i_{s+1}, \dots, i_{k+1})} \\ &= (-1)^{t-1} b_{(i_t, I_{-\{t,s\}})}, \end{aligned}$$

and

$$\begin{aligned} b_{I_{-t}} &= b_{(i_1, \dots, i_{t-1}, i_{t+1}, \dots, i_{k+1})} \\ &= (-1)^{s-2} b_{(i_s, i_1, \dots, i_{t-1}, i_{t+1}, \dots, i_{s-1}, i_{s+1}, \dots, i_{k+1})} \\ &= (-1)^{s-2} b_{(i_s, I_{-\{t,s\}})}. \end{aligned}$$

Therefore,

$$(-1)^{t+s} b_{I_{-t}} \bar{b}_{I_{-s}} = -b_{(i_s, I_{-\{t,s\}})} \bar{b}_{(i_t, I_{-\{t,s\}})}.$$

The same argument holds for the case  $t > s$ . Thus, for each pair of  $(t, s)$ , we have

$$\begin{aligned} &\sum_{I \in [m]^{k+1}} (-1)^{t+s} a_{i_t} b_{I_{-t}} \bar{a}_{i_s} \bar{b}_{I_{-s}} \\ &= - \sum_{I \in [m]^{k+1}} a_{i_t} \bar{a}_{i_s} b_{(i_s, I_{-\{t,s\}})} \bar{b}_{(i_t, I_{-\{t,s\}})} \\ &= - \sum_{J \in [m]^{k-1}} \sum_{i_t=1}^m \sum_{i_s=1}^m a_{i_t} \bar{a}_{i_s} b_{(i_s, J)} \bar{b}_{(i_t, J)} \\ &= - \sum_{J \in [m]^{k-1}} \left( \sum_{i_t=1}^m a_{i_t} \bar{b}_{(i_t, J)} \right) \left( \sum_{i_s=1}^m \bar{a}_{i_s} b_{(i_s, J)} \right) \\ &= - \sum_{J \in [m]^{k-1}} \left| \sum_{i_t=1}^m a_{i_t} \bar{b}_{(i_t, J)} \right|^2. \end{aligned}$$

Thus, the second term can be simplified as

$$\begin{aligned}
& \sum_{I \in [m]^{k+1}} \sum_{1 \leq t \neq s \leq k+1} (-1)^{t+s} a_{i_t} b_{I-t} \bar{a}_{i_s} \bar{b}_{I-s} \\
&= \sum_{1 \leq t \neq s \leq k+1} \sum_{I \in [m]^{k+1}} (-1)^{t+s} a_{i_t} b_{I-t} \bar{a}_{i_s} \bar{b}_{I-s} \\
&= -2k(k+1) \sum_{J \in [m]^{k-1}} \left| \sum_{i_t=1}^m a_{i_t} \bar{b}_{(i_t, J)} \right|^2 \leq 0.
\end{aligned}$$

□

## D Analysis for A poly(nm)-Time Bi-Criteria Algorithm

We can prove that Algorithm ?? from [?] runs in time  $\text{poly}(nm)$  but returns  $O(k \log m)$  columns of  $A$  that can be used in place of  $U$ , with an error  $O(c_{p,k})$  times the error of the best  $k$ -factorization. In other words, it obtains more than  $k$  columns but achieves a polynomial running time. The analysis can be derived by slightly modifying the definition and proof in [?].

**Definition D.1** (Approximate coverage). *Let  $S$  be a subset of  $k$  column indices. We say that column  $A_i$  is  $\lambda_p$ -approximately covered by  $S$  if for  $p \in [1, \infty)$  we have  $\min_{x \in \mathbb{R}^{k \times 1}} \|A_S x - A_i\|_p^p \leq \lambda \frac{100 c_{p,k}^p \|\Delta\|_p^p}{n}$ , and for  $p = \infty$ ,  $\min_{x \in \mathbb{R}^{k \times 1}} \|A_S x - A_i\|_\infty \leq \lambda(k+1) \|\Delta\|_\infty$ . If  $\lambda = 1$ , we say  $A_i$  is covered by  $S$ .*

We first show that if we select a set  $R$  columns of size  $2k$  uniformly at random in  $\binom{[m]}{2k}$ , with constant probability we cover a constant fraction of columns of  $A$ .

**Lemma D.1.** *Suppose  $R$  is a set of  $2k$  uniformly random chosen columns of  $A$ . With probability at least  $2/9$ ,  $R$  covers at least a  $1/10$  fraction of columns of  $A$ .*

*Proof.* Same as the proof of Lemma 6 in [?] except that we use  $c_{p,k}^p$  instead of  $(k+1)$  in the approximation bounds. □

We are now ready to introduce Algorithm ?. As mentioned in [?], we can without loss of generality assume that the algorithm knows a number  $N$  for which  $|\Delta|_p \leq N \leq 2|\Delta|_p$ . Indeed, such a value can be obtained by first computing  $|\Delta|_2$  using the SVD. Note that although one does not know  $\Delta$ , one does know  $|\Delta|_2$  since this is the Euclidean norm of all but the top  $k$  singular values of  $A$ , which one can compute from the SVD of  $A$ . Then, note that for  $p < 2$ ,  $|\Delta|_2 \leq |\Delta|_p \leq n^{2-p} |\Delta|_2$ , while for  $p \geq 2$ ,  $|\Delta|_p \leq |\Delta|_2 \leq n^{1-2/p} |\Delta|_p$ . Hence, there are only  $O(\log n)$  values of  $N$  to try, given  $|\Delta|_2$ , one of which will satisfy  $|\Delta|_p \leq N \leq 2|\Delta|_p$ . One can take the best solution found by Algorithm ?? for each of the  $O(\log n)$  guesses to  $N$ .

**Theorem D.1.** *With probability at least  $9/10$ , Algorithm ?? runs in time  $\text{poly}(nm)$  and returns  $O(k \log m)$  columns that can be used as a factor of the whole matrix inducing  $\ell_p$  error  $O(c_{p,k} |\Delta|_p)$ .*

*Proof.* Same as the proof of Theorem 7 in [?] except that we use  $c_{p,k}^p$  instead of  $(k+1)$  in the approximation bounds. □

## E Analysis for A $((k \log n)^k \text{poly}(mn))$ -Time Algorithm

In this section we show how to get a rank- $k$ ,  $O(c_{p,k}^3 k \log m)$ -approximation efficiently starting from a rank- $O(k \log m)$  approximation. This algorithm runs in polynomial time as long as  $k = O\left(\frac{\log n}{\log \log n}\right)$ .

Let  $U$  be the columns of  $A$  selected by Algorithm ?.

## E.1 An Isoperimetric Transformation

The first step of the proof is to show that we can modify the selected columns of  $A$  to span the same space but to have small distortion. For this, we need the following notion of isoperimetry.

**Definition E.1** (Almost isoperimetry). *A matrix  $B \in \mathbb{R}^{n \times m}$  is almost- $\ell_p$ -isoperimetric if for all  $x$ , we have*

$$\frac{\|x\|_p}{2m} \leq \|Bx\|_p \leq \|x\|_p.$$

The following lemma from [?] show that given a full rank  $A \in \mathbb{R}^{n \times m}$ , it is possible to construct in polynomial time a matrix  $B \in \mathbb{R}^{n \times m}$  such that  $A$  and  $B$  span the same space and  $B$  is almost- $\ell_p$ -isoperimetric.

**Lemma E.1** (Lemma 10 in [?]). *Given a full (column) rank  $A \in \mathbb{R}^{n \times m}$ , there is an algorithm that transforms  $A$  into a matrix  $B$  such that  $\text{span}\{A\} = \text{span}\{B\}$  and  $B$  is almost- $\ell_p$ -isoperimetric. Furthermore the running time of the algorithm is  $\text{poly}(nm)$ .*

## E.2 Reducing the Rank to $k$

Here we give an analysis of Algorithm ?? from [?]. It reduces the rank of our low-rank approximation from  $O(k \log m)$  to  $k$ . Let  $\delta = \|\Delta\|_p = \text{OPT}$ .

**Theorem E.1.** *Let  $A \in \mathbb{R}^{n \times m}$ ,  $U \in \mathbb{R}^{n \times O(k \log m)}$ ,  $V \in \mathbb{R}^{O(k \log m) \times m}$  be such that  $\|A - UV\|_p = O(k\delta)$ . Then, Algorithm ?? runs in time  $O(k \log m)^k (mn)^{O(1)}$  and outputs  $W \in \mathbb{R}^{n \times k}$ ,  $Z \in \mathbb{R}^{k \times m}$  such that  $\|A - WZ\|_p = O((c_{p,k}^3 k \log m)\delta)$ .*

*Proof.* We start by bounding the running time. Step 3 is computationally the most expensive since it requires to execute a brute-force search on the  $O(k \log m)$  columns of  $(Z^0)^T$ . So the running time is  $O((k \log m)^k (mn)^{O(1)})$ .

Now we have to show that the algorithm returns a good approximation. The main idea behind the proof is that  $UV$  is a low-rank approximable matrix. So after applying Lemma E.1 to  $U$  to obtain a low-rank approximation for  $UV$  we can simply focus on  $Z^0 \in \mathbb{R}^{O(k \log m) \times n}$ . Next, by applying Algorithm ?? to  $Z^0$ , we obtain a low-rank approximation in time  $O(k \log m)^k (mn)^{O(1)}$ . Finally we can use this solution to construct the solution to our initial problem.

We know by assumption that  $\|A - UV\|_p = O(c_{p,k}\delta)$ . Therefore, it suffices by the triangle inequality to show  $\|UV - WZ\|_p = O(c_{p,k}^3 k \log m \delta)$ . First note that  $UV = W^0 Z^0$  since Lemma E.1 guarantees that  $\text{span}\{U\} = \text{span}\{W^0\}$ . Hence we can focus on proving  $\|W^0 Z^0 - WZ\|_p \leq O((c_{p,k}^3 k \log m)\delta)$ .

We first prove two useful intermediate steps.

**Lemma E.2.** *There exist matrices  $U^* \in \mathbb{R}^{n \times k}$ ,  $V^* \in \mathbb{R}^{k \times m}$  such that  $\|W^0 Z^0 - U^* V^*\|_p = O(c_{p,k}\delta)$ .*

*Proof.* Same as the proof of Lemma 12 in [?] except that we use  $O(c_{p,k}\delta)$  instead of  $O(k\delta)$ .  $\square$

**Lemma E.3.** *There exist matrices  $F \in \mathbb{R}^{O(k \log m) \times k}$ ,  $D \in \mathbb{R}^{k \times n}$  such that  $\|W^0(Z^0 - FD)\|_p = O(c_{p,k}^2 \delta)$ .*

*Proof.* Same as the proof of Lemma 13 in [?] except that we use  $O(c_{p,k}\delta)$  and  $O(c_{p,k}^2 \delta)$  instead of  $O(k\delta)$  and  $O(k^2 \delta)$ .  $\square$

Now from the guarantees of Lemma E.1 we know that for any vector  $y$ ,  $\|W^0 y\|_p \leq \frac{\|y\|_p}{k \log m}$ . So we have  $\|Z^0 - FD\|_p \leq O((c_{p,k}^2 k \log m)\delta)$ . Thus  $\|(Z^0)^T - D^T F^T\|_p \leq O((c_{p,k}^2 k \log m)\delta)$ , so  $(Z^0)^T$  has a low-rank approximation with error at most  $O((c_{p,k}^2 k \log m)\delta)$ . So we can apply Theorem ?? again and we know that there are  $k$  columns of  $(Z^0)^T$  such that the low-rank approximation obtained starting from those columns has error at most  $O((c_{p,k}^3 k \log m)\delta)$ . We obtain such a low-rank

approximation from Algorithm ?? with input  $(Z^0)^T \in \mathbb{R}^{n \times O(k \log m)}$  and  $k$ . More precisely, we obtain an  $X \in \mathbb{R}^{n \times k}$  and  $Y \in \mathbb{R}^{k \times O(k \log m)}$  such that  $\|(Z^0)^T - XY\|_p \leq O((c_{p,k}^3 k \log m) \delta)$ . Thus  $\|Z^0 - Y^T X^T\|_p \leq O((c_{p,k}^3 k \log m) \delta)$ .

Now using again the guarantees of Lemma E.1 for  $W^0$ , we get  $\|W^0(Z^0 - Y^T X^T)\|_p \leq O((c_{p,k}^3 k \log m) \delta)$ . So  $\|W^0(Z^0 - Y^T X^T)\|_p = \|W^0 Z^0 - WZ\|_p = \|UV - WZ\|_p \leq O((c_{p,k}^3 k \log m) \delta)$ . By combining it with  $\|A - UV\|_p = O(c_{p,k} \delta)$  and using the Minkowski inequality, the proof is complete.  $\square$
